# Supplementary material for: Pretreatment Frequency of Circulating Th17 Cells and FeNO Levels Predicted the Real-World Response after 1 Year of Benralizumab Treatment in Patients with Severe Asthma
Source: MDPI journal article supplement (doi:10.3390/biom13030538), 2023-03-15

Supplemental Table S1. The detection limits of the multiplex bead array assays and ELISA

| Target         | Assay working range (pg/mL) |          |
|----------------|-----------------------------|----------|
|                | LLOQ                        | ULOQ     |
| Periostin      | 0.0                         | 2,000.0  |
| Tenascin-C     | 380.0                       | 24,000.0 |
| Eotaxin-1      | 3.2                         | 10,000.0 |
| IFN- $\gamma$  | 3.2                         | 10,000.0 |
| IL-4           | 3.2                         | 10,000.0 |
| IL-5           | 3.2                         | 10,000.0 |
| IL-13          | 3.2                         | 10,000.0 |
| IL-17          | 3.2                         | 10,000.0 |
| MCP-1          | 3.2                         | 10,000.0 |
| MIP-1 $\alpha$ | 3.2                         | 10,000.0 |
| MIP-1 $\beta$  | 3.2                         | 10,000.0 |
| RANTES         | 15.6                        | 1,000.0  |

Abbreviations: IL, interleukin; IFN- $\gamma$ , interferon-gamma;

LLOQ, lower limit of quantitation; ULOQ, upper limit of quantitation; MIP, macrophage inflammatory protein;

MCP, monocyte chemotactic protein;

RANTES, regulated on activation normal T cell expressed and secreted.

Supplementary Table S2. Baseline characteristics of the study population and kinetics of parameters in patients with/without previous use of biologics.

|                                                | Patients without previous use of biologics |                             |          | Patients with previous use of biologics |                               |          |
|------------------------------------------------|--------------------------------------------|-----------------------------|----------|-----------------------------------------|-------------------------------|----------|
|                                                | Baseline (n = 13)                          | 1 year after (n = 13)       | p value  | Baseline (n = 17)                       | 1 year after (n = 17)         | p value  |
| Asthma exacerbations (/year)                   | 3.0 (1.0 – 4.0)                            | 0.0 (0.0 – 2.0)             | 0.065    | 2.0 (0.5 – 3.5)                         | 1.6 ± 1.4                     | 0.132    |
| Unscheduled visits (/year)                     | 1.0 (0.0 – 3.0)                            | 0.5 ± 0.7                   | 0.055    | 0.9 ± 1.2                               | 0.0 (0.0 – 1.0)               | 0.563    |
| Hospitalizations (/year)                       | 0.3 ± 0.5                                  | 0.0 (0.0 – 0.0)             | 0.250    | 0.0 (0.0 – 0.0)                         | 0.0 (0.0 – 0.0)               | 0.500    |
| ACT score points                               | 16.8 ± 6.2                                 | 24.0 (18.5 – 25.0)          | 0.020*   | 17.1 ± 5.4                              | 20.2 ± 3.7                    | 0.057    |
| FeNO (ppb)                                     | 43.0 (12.5 – 71.5)                         | 32.0 (19.0 – 72.0)          | 0.278    | 54.0 ± 42.0                             | 49.0 (21.5 – 80.0)            | 0.826    |
| FVC (L)                                        | 3.2 ± 0.6                                  | 3.3 ± 0.7                   | 0.845    | 2.7 ± 0.6                               | 2.7 ± 0.5                     | 0.886    |
| %FVC (predicted, %)                            | 95.9 ± 16.5                                | 96.6 ± 17.1                 | 0.842    | 98.8 ± 13.7                             | 99.7 ± 14.4                   | 0.725    |
| FEV <sub>1</sub> (L)                           | 2.4 ± 0.7                                  | 2.6 ± 0.7                   | 0.243    | 1.8 ± 0.6                               | 1.9 ± 0.6                     | 0.389    |
| %FEV <sub>1</sub> (predicted, %)               | 84.2 ± 24.1                                | 89.8 ± 22.6                 | 0.133    | 82.3 ± 26.6                             | 85.8 ± 24.8                   | 0.154    |
| FEV <sub>1</sub> % (%)                         | 73.1 ± 15.0                                | 77.6 ± 13.2                 | 0.007*   | 68.1 ± 19.7                             | 70.3 ± 17.4                   | 0.091    |
| PEFR (L/s)                                     | 7.1 ± 2.0                                  | 7.6 ± 2.1                   | 0.187    | 6.2 ± 2.1                               | 6.2 ± 1.8                     | 0.841    |
| %PEFR (predicted, %)                           | 92.0 ± 23.7                                | 98.6 ± 22.6                 | 0.091    | 101.5 ± 30.1                            | 101.9 ± 25.1                  | 0.923    |
| MMF (L/s)                                      | 2.2 ± 1.4                                  | 2.6 ± 1.4                   | 0.081    | 1.6 ± 1.2                               | 1.6 ± 1.1                     | 0.773    |
| %MMF (predicted, %)                            | 61.4 ± 37.6                                | 71.7 ± 33.8                 | 0.065    | 55.7 ± 41.5                             | 58.4 ± 37.0                   | 0.520    |
| Neutrophils (%)                                | 61.2 ± 10.3                                | 63.7 (57.1 – 68.4)          | 0.191    | 60.7 ± 8.0                              | 62.1 ± 8.5                    | 0.528    |
| Neutrophils (×10 <sup>2</sup> cells/μL)        | 41.3 ± 18.4                                | 36.9 (25.8 – 44.4)          | 0.735    | 32.5 (27.4 – 39.7)                      | 32.7 (26.7 – 38.3)            | 0.818    |
| Eosinophils (%)                                | 4.6 (0.7 – 8.9)                            | 0.0 (0.0 – 0.0)             | < 0.001* | 1.0 (0.5 – 2.9)                         | 0.0 (0.0 – 0.0)               | 0.003*   |
| Eosinophils (cells/μL)                         | 188.1 (46.3 – 693.0)                       | 0.0 (0.0 – 0.0)             | < 0.001* | 48.0 (29.5 – 200.5)                     | 0.0 (0.0 – 0.0)               | 0.003*   |
| Basophils (%)                                  | 0.7 ± 0.5                                  | 0.0 (0.0 – 0.2)             | 0.001*   | 0.5 ± 0.3                               | 0.0 (0.0 – 0.2)               | 0.002*   |
| Basophils (cells/μL)                           | 44.4 ± 40.2                                | 5.1 ± 7.5                   | 0.005*   | 29.2 ± 21.4                             | 0.0 (0.0 – 10.9)              | < 0.001* |
| Lymphocytes (%)                                | 26.3 ± 7.5                                 | 29.5 ± 8.5                  | 0.053    | 29.5 ± 6.7                              | 30.5 ± 7.5                    | 0.617    |
| Lymphocytes (×10 <sup>2</sup> cells/μL)        | 16.5 ± 4.5                                 | 16.6 ± 5.2                  | 0.884    | 17.0 ± 3.6                              | 16.5 ± 5.0                    | 0.801    |
| Monocytes (%)                                  | 6.0 ± 2.1                                  | 6.4 ± 1.9                   | 0.602    | 6.4 ± 1.9                               | 5.5 (4.3 – 6.7)               | 0.269    |
| Monocytes (cells/μL)                           | 397.6 ± 150.7                              | 366.8 ± 127.7               | 0.361    | 319.0 (281.1 – 404.3)                   | 272.0 (229.3 – 352.8)         | 0.132    |
| Total IgE (IU/ mL)                             | 87.0 (21.5 – 342.0)                        | 83.0 (24.0 – 270.5)         | 0.806    | 80.0 (47.8 – 800.3) (n = 16)            | 144.5 (54.5 – 858.5) (n = 16) | > 0.999  |
| Periostin (ng/ mL)                             | 83.4 ± 55.7                                | 92.5 ± 49.6                 | 0.352    | 83.0 (66.0 – 105.5)                     | 79.0 (59.5 – 122.5)           | 0.438    |
| Tenascin-C (ng/mL)                             | 29.5 (25.2 – 59.9)                         | 29.4 (18.5 – 40.6)          | 0.168    | 43.3 ± 16.7                             | 41.9 ± 15.3                   | 0.699    |
| Eotaxin-1 (pg/mL)                              | 97.2 ± 50.3                                | 189.3 ± 76.7                | < 0.001* | 145.4 ± 57.5                            | 274.9 (149.2 – 347.4)         | < 0.001* |
| IFN-γ (pg/mL)                                  | 7.4 (3.4 – 145.8) (n = 5)                  | 12.4 (7.2 – 45.1) (n = 5)   | 0.813    | 5.1 (3.7 – 35.3) (n = 4)                | 8.1 (1.5 – 18.1) (n = 4)      | 0.625    |
| IL-5 (pg/mL)                                   | 1.4 (0.9 – 8.0) (n = 6)                    | 12.4 (5.8 – 25.0) (n = 6)   | 0.031*   | 8.0 (2.3 – 27.6) (n = 14)               | 6.0 (2.8 – 17.0) (n = 14)     | 0.194    |
| IL-17 (pg/mL)                                  | 2.6 (1.5 – 31.8) (n = 5)                   | 2.5 (1.7 – 10.5) (n = 5)    | 0.729    | 2.6 (1.3 – 10.5) (n = 3)                | 2.6 (0.7 – 4.6) (n = 3)       | 0.729    |
| MCP-1 (pg/mL)                                  | 573.2 ± 233.3                              | 522.0 (357.2 – 620.6)       | 0.542    | 628.4 ± 182.8                           | 591.3 ± 182.6                 | 0.281    |
| MIP-1β (pg/mL)                                 | 74.7 ± 35.8                                | 79.7 ± 30.4                 | 0.337    | 49.4 (40.1 – 71.4)                      | 60.8 ± 22.0                   | 0.459    |
| RANTES (ng/mL)                                 | 28.2 ± 13.8 (n = 12)                       | 28.5 (18.3 – 31.1) (n = 12) | 0.791    | 29.1 (23.5 – 38.3)                      | 29.1 ± 14.8                   | 0.225    |
| Th1 cells (% of Th cells, %)                   | 20.7 ± 8.3                                 | 18.7 ± 7.4                  | 0.204    | 18.8 (14.6 – 23.3)                      | 18.5 (15.7 – 24.5)            | 0.963    |
| Th2 cells (% of Th cells, %)                   | 4.6 ± 2.1                                  | 5.2 ± 2.0                   | 0.232    | 6.2 ± 3.1                               | 6.9 ± 2.6                     | 0.075    |
| Th17 cells (% of Th cells, %)                  | 5.0 ± 1.7                                  | 4.9 ± 1.8                   | 0.817    | 5.7 ± 2.1                               | 6.1 ± 2.2                     | 0.037*   |
| Treg cells (% of Th cells, %)                  | 5.2 (4.2 – 7.0) (n = 12)                   | 5.3 ± 1.5 (n = 12)          | 0.331    | 6.3 ± 1.6 (n = 14)                      | 5.5 ± 1.6 (n = 14)            | 0.020*   |
| ILC1 (% of ILC cells, %)                       | 65.1 ± 15.2                                | 56.3 ± 9.7                  | 0.0498*  | 63.5 ± 11.3                             | 66.2 ± 15.0                   | 0.477    |
| ILC2 (% of ILC cells, %)                       | 23.3 ± 14.2                                | 29.0 ± 13.1                 | 0.102    | 22.7 ± 9.6                              | 22.9 ± 13.0                   | 0.941    |
| ILC3 (% of ILC cells, %)                       | 11.6 ± 6.6                                 | 14.7 ± 8.9                  | 0.344    | 9.9 (8.6 – 17.6)                        | 10.9 ± 9.0                    | 0.424    |
| NK cells (% of lymphoid cells, %)              | 13.7 ± 10.4                                | 16.9 ± 10.7                 | 0.252    | 10.0 (5.8 – 16.5)                       | 11.3 ± 5.3                    | 0.712    |
| γδT cells (% of lymphoid cells, %)             | 2.7 ± 1.2                                  | 2.6 (2.0 – 3.1)             | 0.787    | 2.3 (1.4 – 4.4)                         | 2.6 (1.4 – 4.3)               | 0.782    |
| NKT (% of lymphoid cells, ×10 <sup>-3</sup> %) | 7.7 ± 6.7 (n = 11)                         | 4.8 (2.2 – 7.5) (n = 11)    | 0.320    | 5.3 (4.0 – 25.4) (n = 16)               | 4.0 (1.9 – 14.5) (n = 16)     | 0.013*   |

|                                             |           |           |       |                        |                  |       |
|---------------------------------------------|-----------|-----------|-------|------------------------|------------------|-------|
| MAIT cells (% of CD3 <sup>+</sup> cells, %) | 2.2 ± 1.5 | 1.6 ± 0.9 | 0.173 | 2.9 (1.3 – 2.5) (n=16) | 1.8 ± 1.0 (n=16) | 0.155 |
|---------------------------------------------|-----------|-----------|-------|------------------------|------------------|-------|

For normally distributed data, number quoted is mean ± SD.

For nonparametric variables, number quoted is median (interquartile range).

\* $p < 0.05$

Supplemental Table S3. Responder analysis of benralizumab treatment in patients without previous use of biologics.

|                                              | Responder (n = 8)          | Non-responder (n = 5)    | P value | Super-Responder (n = 5)  | Others (n = 8)            | p value |
|----------------------------------------------|----------------------------|--------------------------|---------|--------------------------|---------------------------|---------|
| Sex (M/F), n (%)                             | 4 (50.0%)/ 4 (50.0%)       | 2 (40.0%)/ 3 (60.0%)     | > 0.999 | 4 (80.0%)/ 1 (20.0%)     | 2 (25.0%)/ 6 (75.0%)      | 0.103   |
| Age (y)                                      | 52.6 ± 11.7                | 42.0 (24.5 – 58.5)       | 0.222   | 53.0 (41.5 – 55.5)       | 47.8 ± 18.8               | 0.833   |
| Age at asthma onset (y)                      | 41.9 ± 16.3                | 10.0 (6.0 – 21.0)        | 0.002*  | 29.0 (25.5 – 51.5)       | 27.0 ± 22.8               | 0.237   |
| Duration of asthma (y)                       | 10.8 ± 10.6                | 20.0 (12.0 – 50.0)       | 0.062   | 7.0 (3.5 – 25.0)         | 20.8 ± 19.9               | 0.550   |
| BMI (kg/m <sup>2</sup> )                     | 24.4 ± 4.6                 | 23.3 (18.5 – 29.4)       | 0.943   | 25.2 (20.7 – 30.2)       | 23.5 ± 4.6                | 0.524   |
| Smoking history (never/ex), n (%)            | 5 (62.5%)/3 (37.5%)        | 4 (80.0%)/1 (20.0%)      | > 0.999 | 2 (40.0%)/ 3 (60.0%)     | 2 (25.0%)/ 6 (75.0%)      | > 0.999 |
| AERD, n (%)                                  | 2 (25.0%)                  | 1 (20.0%)                | > 0.999 | 1 (20.0%)                | 2 (25.0%)                 | > 0.999 |
| Atopic dermatitis, n (%)                     | 0 (0.0%)                   | 3 (60.0%)                | 0.035*  | 0 (0.0%)                 | 3 (37.5%)                 | 0.231   |
| Allergic rhinitis, n (%)                     | 7 (87.5%)                  | 4 (80.0%)                | > 0.999 | 5 (100.0%)               | 6 (75.0%)                 | 0.487   |
| Chronic sinusitis, n (%)                     | 6 (75.0%)                  | 3 (60.0%)                | > 0.999 | 4 (80.0%)                | 5 (62.5%)                 | > 0.999 |
| ABPA, n (%)                                  | 0 (0.0%)                   | 1 (20.0%)                | 0.385   | 0 (0.0%)                 | 1 (12.5%)                 | > 0.999 |
| Daily dose of ICS (FP equivalent dose, µg )  | 812.5 ± 241.7              | 1000.0 (1000.0 – 1000.0) | 0.161   | 800.0 (600.0 – 1000.0)   | 1000.0 (1000.0 – 1000.0)  | 0.189   |
| Oral corticosteroid treatment, n (%)         | 0 (0.0%)                   | 2 (40.0%)                | 0.128   | 0 (0.0%)                 | 2 (25.0%)                 | 0.487   |
| Daily dose of OCS (PSL equivalent dose, mg ) | 0.0 (0.0 – 0.0)            | 0.0 (0.0 – 5.0)          | 0.128   | 0.0 (0.0 – 0.0)          | 1.3 ± 2.3                 | 0.487   |
| Asthma exacerbations (/year)                 | 3.5 (1.3 – 4.8)            | 3.0 (0.5 – 3.5)          | 0.411   | 4.0 (2.5 – 14.5)         | 2.0 ± 1.5                 | 0.051   |
| Unscheduled visits (/year)                   | 1.5 (0.0 – 5.3)            | 1.0 (0.0 – 2.0)          | 0.549   | 2.0 (0.5 – 9.0)          | 1.0 ± 1.3                 | 0.183   |
| Hospitalizations (/year)                     | 0.0 (0.0 – 1.0)            | 0.0 (0.0 – 1.0)          | > 0.999 | 0.0 (0.0 – 0.0)          | 0.5 (0.0 – 1.0)           | 0.208   |
| ACT score points                             | 15.4 ± 7.2                 | 20.0 (15.5 – 22.0)       | 0.523   | 14.0 (9.0 – 20.0)        | 20.5 (14.3 – 22.8)        | 0.220   |
| FeNO (ppb)                                   | 48.0 (23.5 – 100.0)        | 15.0 (10.0 – 29.0)       | 0.052   | 94.0 (48.0 – 201.0)      | 20.0 ± 14.6               | 0.002*  |
| FVC (L)                                      | 3.2 ± 0.7                  | 3.3 (2.9 – 3.6)          | 0.697   | 3.4 (3.0 – 3.9)          | 3.1 ± 0.6                 | 0.594   |
| %FVC (predicted, %)                          | 97.8 ± 19.7                | 92.7 (83.6 – 102.2)      | 0.622   | 81.6 (72.2 – 115.8)      | 98.7 ± 12.5               | 0.524   |
| FEV <sub>1</sub> (L)                         | 2.2 ± 0.65                 | 2.9 (2.0 – 3.2)          | 0.302   | 2.5 (1.7 – 2.9)          | 2.5 ± 0.8                 | 0.547   |
| %FEV <sub>1</sub> (predicted, %)             | 79.0 ± 27.1                | 92.9 (66.4 – 105.0)      | > 0.999 | 78.7 (47.2 – 96.9)       | 91.0 ± 21.9               | 0.284   |
| FEV <sub>1</sub> % (%)                       | 69.4 ± 13.3                | 83.7 (65.7 – 90.1)       | 0.284   | 64.2 (55.4 – 80.0)       | 76.9 ± 15.7               | 0.284   |
| PEFR (L/s)                                   | 7.1 ± 2.3                  | 7.7 (5.4 – 8.9)          | 0.979   | 6.6 (5.8 – 9.7)          | 6.9 ± 2.1                 | 0.412   |
| %PEFR (predicted, %)                         | 93.8 ± 24.9                | 93.3 (65.3 – 110.8)      | > 0.999 | 100.8 (61.2 – 105.6)     | 95.2 ± 24.8               | 0.724   |
| MMF (L/s)                                    | 1.7 ± 1.1                  | 3.4 (1.5 – 4.4)          | 0.171   | 1.5 (0.6 – 2.6)          | 2.6 ± 1.5                 | 0.354   |
| %MMF (predicted, %)                          | 51.2 ± 34.6                | 95.6 (37.4 – 109.0)      | 0.284   | 38.7 (14.7 – 66.9)       | 74.6 ± 39.0               | 0.093   |
| Neutrophils (%)                              | 60.4 ± 11.2                | 61.1 (53.7 – 72.2)       | 0.833   | 57.8 (47.3 – 62.2)       | 64.9 ± 10.2               | 0.222   |
| Neutrophils (×10 <sup>2</sup> cells/µL)      | 39.4 ± 14.3                | 30.6 (24.8 – 70.4)       | > 0.999 | 30.2 (24.7 – 40.7)       | 46.9 ± 20.8               | 0.222   |
| Eosinophils (%)                              | 6.1 (1.6 – 9.8)            | 1.6 (0.6 – 6.4)          | 0.354   | 8.1 (6.1 – 16.5)         | 1.2 (0.5 – 4.2)           | 0.011*  |
| Eosinophils (cells/µL)                       | 303.5 (86.8 – 748.0)       | 80.0 (34.3 – 645.5)      | 0.354   | 583.0 (241.1 – 1170.0)   | 66.0 (31.6 – 274.3)       | 0.045*  |
| Basophils (%)                                | 0.7 ± 0.5                  | 0.4 (0.2 – 1.1)          | 0.643   | 1.1 (0.7 – 1.4)          | 0.4 ± 0.4                 | 0.019*  |
| Basophils (cells/µL)                         | 45.6 ± 35.8                | 20.4 (10.0 – 85.9)       | 0.649   | 50.6 (36.8 – 97.8)       | 20.2 (9.4 – 36.6)         | 0.040*  |
| Lymphocytes (%)                              | 25.7 ± 5.8                 | 29.3 (16.4 – 37.0)       | 0.803   | 27.0 (21.2 – 30.4)       | 26.4 ± 9.1                | 0.974   |
| Lymphocytes (×10 <sup>2</sup> cells/µL)      | 16.6 ± 5.6                 | 15.0 (14.2 – 18.8)       | 0.943   | 17.6 (92.6 – 20.8)       | 17.0 ± 3.5                | 0.622   |
| Monocytes (%)                                | 5.9 ± 1.9                  | 6.5 (5.3 – 7.9)          | 0.435   | 7.0 (5.6 – 8.4)          | 5.7 ± 1.6                 | 0.284   |
| Monocytes (cells/µL)                         | 377.7 ± 159.4              | 418.2 (301.3 – 563.6)    | 0.524   | 322.0 (265.4 – 625.5)    | 383.2 ± 131.1             | > 0.999 |
| Total IgE (IU/ mL)                           | 217.1 ± 237.8              | 25.0 (11.5 – 2638.5)     | 0.435   | 231.0 (144.0 – 567.0)    | 23.5 (20.3 – 106.3)       | 0.045*  |
| Periostin (ng/ mL)                           | 100.6 ± 64.0               | 45.0 (36.0 – 81.0)       | 0.182   | 90.0 (73.5 – 157.5)      | 43.0 (33.8 – 84.5)        | 0.051   |
| Tenascin-C (ng/mL)                           | 37.7 ± 17.7                | 36.8 (20.6 – 156.0)      | 0.833   | 29.5 (24.6 – 45.7)       | 33.0 (23.9 – 70.5)        | 0.622   |
| Eotaxin-1 (pg/mL)                            | 97.4 ± 56.5                | 69.4 (64.1 – 143.5)      | 0.943   | 90.4 (54.5 – 112.8)      | 104.8 ± 59.7              | 0.943   |
| IFN-γ (pg/mL)                                | 12.4 (1.2 – 279.1) (n = 3) | 6.5 (5.6 – 7.4) (n = 2)  | 0.800   | 6.8 (1.2 – 12.4) (n = 2) | 7.4 (5.6 – 279.1) (n = 3) | 0.800   |
| IL-5 (pg/mL)                                 | 7.4 (0.7 – 9.9) (n = 3)    | 1.1 (1.0 – 1.7) (n = 3)  | 0.700   | 7.4 (0.7 – 9.9) (n = 3)  | 1.1 (1.0 – 1.7) (n = 3)   | 0.700   |
| IL-17 (pg/mL)                                | 3.4 (1.3 – 60.1) (n = 3)   | 1.8 (0.7 – 2.6) (n = 3)  | 0.400   | 2.4 (1.3 – 3.4) (n = 2)  | 2.2 (1.0 – 45.7) (n = 4)  | > 0.999 |

|                                                |                         |                          |        |                          |                         |         |
|------------------------------------------------|-------------------------|--------------------------|--------|--------------------------|-------------------------|---------|
| MCP-1 (pg/mL)                                  | 612.2 ± 281.4           | 567.7 (385.6 – 607.5)    | 0.622  | 643.8 (300.3 – 936.2)    | 541.8 ± 180.3           | 0.622   |
| MIP-1β (pg/mL)                                 | 83.0 ± 37.6             | 54.0 (38.5 – 88.0)       | 0.435  | 81.9 (68.1 – 131.8)      | 61.1 ± 30.1             | 0.093   |
| RANTES (ng/mL)                                 | 30.0 ± 16.7             | 25.2 (21.5 – 33.7)       | 0.833  | 37.8 (20.8 – 49.2)       | 24.7 ± 11.0             | 0.222   |
| Th1 cells (% of Th cells, %)                   | 22.3 ± 8.9              | 16.0 (12.5 – 24.8)       | 0.435  | 16.9 (11.8 – 25.3)       | 22.2 ± 9.0              | 0.524   |
| Th2 cells (% of Th cells, %)                   | 5.1 ± 2.1               | 3.7 (1.8 – 6.0)          | 0.354  | 5.8 (3.7 – 7.8)          | 3.9 ± 1.8               | 0.171   |
| Th17 cells (% of Th cells, %)                  | 5.7 ± 1.2               | 4.3 (2.4 – 5.4)          | 0.030* | 6.9 (4.8 – 7.2)          | 4.6 (3.9 – 5.0)         | 0.019*  |
| Treg cells (% of Th cells, %)                  | 4.8 (3.9 – 6.7)         | 6.0 (4.6 – 7.4) (n = 4)  | 0.461  | 5.4 (4.8 – 8.7) (n = 5)  | 4.3 (3.8 – 6.7) (n = 7) | 0.202   |
| ILC1 (% of ILC cells, %)                       | 66.6 ± 13.5             | 59.6 (49.6 – 77.5)       | 0.524  | 67.2 (52.6 – 72.0)       | 66.3 ± 17.1             | 0.943   |
| ILC2 (% of ILC cells, %)                       | 23.6 ± 13.7             | 24.5 (7.7 – 37.4)        | 0.943  | 23.6 (12.4 – 38.9)       | 22.1 ± 14.4             | 0.833   |
| ILC3 (% of ILC cells, %)                       | 9.8 ± 4.6               | 13.1 (6.9 – 22.5)        | 0.284  | 9.2 (8.6 – 15.7)         | 11.6 ± 8.1              | 0.943   |
| NK cells (% of lymphoid cells, %)              | 16.5 ± 12.2             | 6.5 (4.9 – 15.1)         | 0.222  | 9.7 (7.8 – 30.6)         | 7.3 (5.4 – 15.4)        | 0.354   |
| γδT cells (% of lymphoid cells, %)             | 3.1 ± 1.3               | 2.0 (1.4 – 2.9)          | 0.121  | 2.6 (2.1 – 3.3)          | 2.7 ± 1.5               | 0.591   |
| NKT (% of lymphoid cells, ×10 <sup>-3</sup> %) | 1.6 (0.6 – 6.1) (n = 7) | 9.1 (4.6 – 17.0) (n = 5) | 0.073  | 3.8 (0.4 – 15.0) (n = 4) | 7.5 ± 6.6               | 0.570   |
| MAIT cells (% of CD3 <sup>+</sup> cells, %)    | 1.8 (0.8 – 2.8)         | 3.5 (0.5 – 4.3)          | 0.622  | 1.4 (0.8 – 3.4)          | 2.3 ± 1.7               | > 0.999 |

For normally distributed data, number quoted is mean ± SD.

For nonparametric variables, number quoted is median (interquartile range).

\**p* < 0.05

Supplementary Figure S1

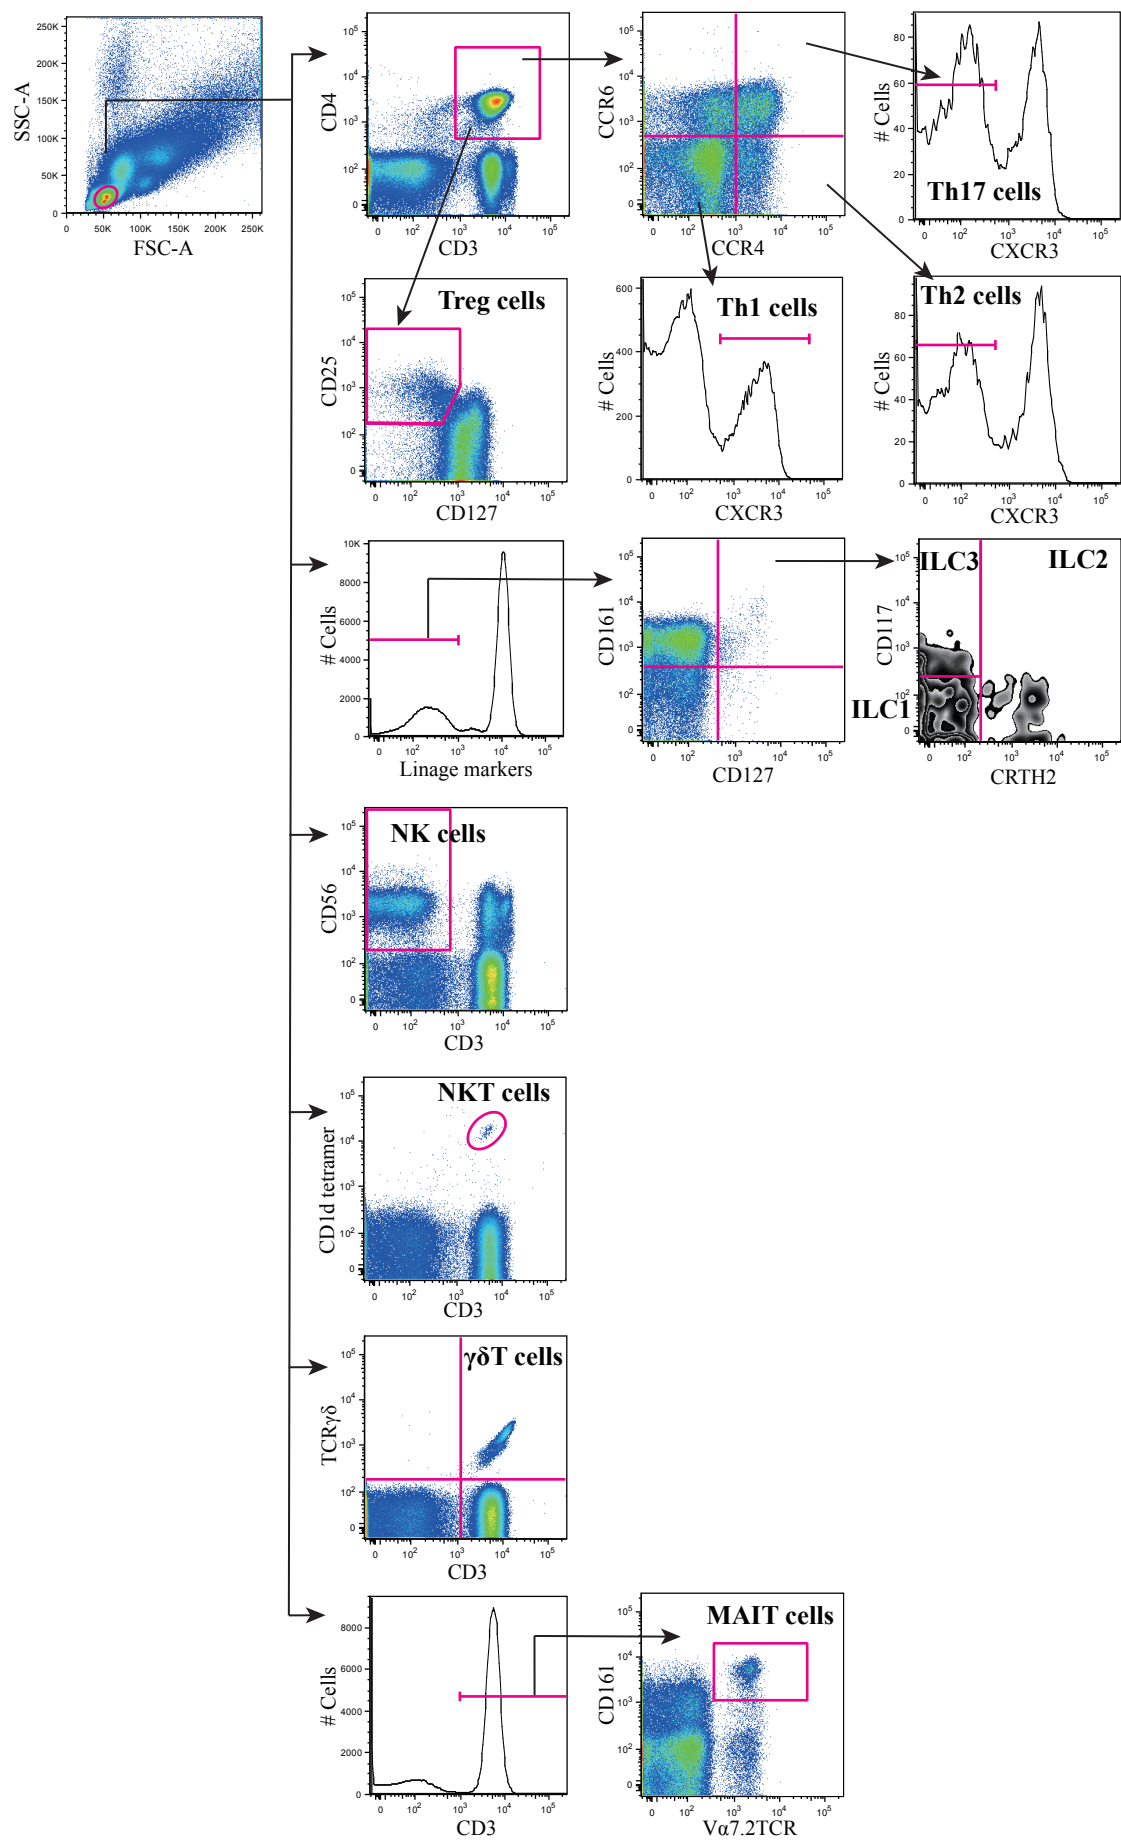

Supplement: s1 [file s1]
